# Supplementary material
Source: publisher figshare collection journal article supplement (https://acs.figshare.com/ndownloader/files/21391575)
Supplement: Supplementary file 1 [file 21391575]

# SUPPORTING INFORMATION

## Role of Depolarization Factors in the Evolution of a Dipolar Plasmonic Spectral Line in the Far- and Near-Field Regimes

Mochamad Januar,<sup>†</sup> Bei Liu,<sup>†</sup> Jui-Ching Cheng,<sup>‡</sup> Koji Hatanaka,<sup>¶,§,||</sup> Hiroaki  
Misawa,<sup>⊥, #</sup> Hui-Hsin Hsiao,<sup>\*, @</sup> and Kou-Chen Liu<sup>\*, †, △, ∇</sup>

<sup>†</sup>*Department of Electronic Engineering, Chang Gung University, Taoyuan 33302, Taiwan*

<sup>‡</sup>*Department of Electronic Engineering, National Taipei University of Technology, Taipei  
10608, Taiwan*

<sup>¶</sup>*Research Center for Applied Sciences, Academia Sinica, Taipei 11529, Taiwan*

<sup>§</sup>*College of Engineering, Chang Gung University, Taoyuan 33302, Taiwan*

<sup>||</sup>*Department of Materials Science and Engineering, National Dong Hwa University,  
Hualien 97401, Taiwan*

<sup>⊥</sup>*Research Institute for Electronic Science, Hokkaido University, Sapporo 001-0021, Japan*

<sup>#</sup>*Center for Emergent Functional Matter Science, National Chiao Tung University,  
Hsinchu 30010, Taiwan*

<sup>@</sup>*Institute of Electro-Optical Engineering, National Taiwan Normal University, Taipei  
11677, Taiwan*

<sup>△</sup>*Division of Pediatric Infectious Disease, Department of Pediatrics, Chang Gung  
Memorial Hospital, Linkou 33305, Taiwan*

<sup>∇</sup>*Department of Materials Engineering, Ming Chi University of Technology, New Taipei  
City 24301, Taiwan*

E-mail: [hhsiao@ntnu.edu.tw](mailto:hhsiao@ntnu.edu.tw); [jacobliu@mail.cgu.edu.tw](mailto:jacobliu@mail.cgu.edu.tw)

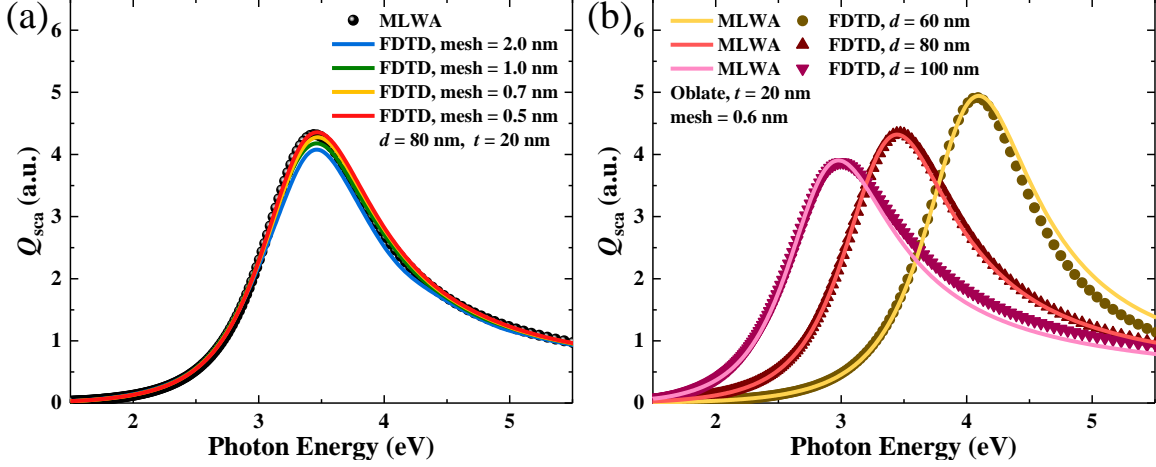

Figure S1: The far-field spectra obtained with the MLWA model (curves) and the numerical full-wave electrodynamics method (symbols) for oblate-shaped particles with different (a) mesh sizes and (b) particle diameters.

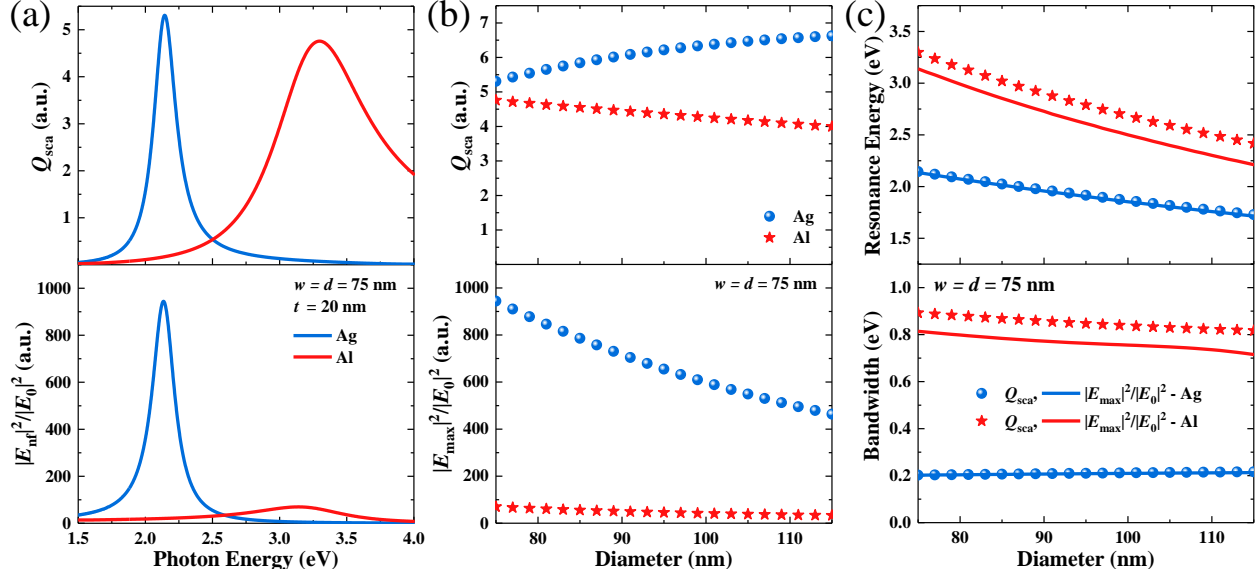

Figure S2: (a) The far-field (upper) and near-field (lower) spectra for Ag and Al oblate ellipsoidal particle. (b) The variation of far-field (upper) and near-field (lower) intensity as a function of diameter, and (c) the corresponding trend of resonant energy (upper) and bandwidth (lower).

In this supplementary material, we elaborate on the derivation of the analytical forms provided in the main paper in greater detail (the expressions in Table 1, *i.e.*, eqs 14 and 15, and eqs 19 to 24). We begin from the expressions for the dipolar polarizability in the MLWA

model (refers to [eq 8](#) of the manuscript), which is given by

$$\alpha_{\text{eff}} = V \frac{\epsilon - \epsilon_{\text{m}}}{\epsilon_{\text{m}} + L_{\text{eff}}(\epsilon - \epsilon_{\text{m}})}, \quad (\text{S1})$$

where  $L_{\text{eff}}$  is the effective depolarization-factor with the inclusion of the finite wavelength corrections given by

$$L_{\text{eff}}(\omega) = L - L_{\text{dyn}}\omega^2 - iL_{\text{rad}}\omega^3. \quad (\text{S2})$$

Moreover, the Drude model of the metallic dispersion relation is given by<sup>[1,2](#)</sup>

$$\epsilon(\omega) = 1 - \frac{\omega_{\text{p}}^2}{\omega^2 + i\gamma\omega}. \quad (\text{S3})$$

To have a simpler form, we modify [eq S1](#) to become

$$\alpha_{\text{eff}} = \frac{V}{\frac{\epsilon_{\text{m}}}{\epsilon - \epsilon_{\text{m}}} + L_{\text{eff}}}. \quad (\text{S4})$$

Then, by defining  $\epsilon$  as the Drude dielectric-function in [eq S3](#), one obtains

$$\begin{aligned} \alpha_{\text{eff}} &= \frac{V}{\frac{\epsilon_{\text{m}}}{1 - \frac{\omega_{\text{p}}^2}{\omega^2 + i\gamma\omega}} - \epsilon_{\text{m}}} + L_{\text{eff}} \\ &= \frac{V}{\frac{1}{\frac{1}{\epsilon_{\text{m}}} - 1 - \frac{\omega_{\text{p}}^2}{\epsilon_{\text{m}}(\omega^2 + i\gamma\omega)}}} + L_{\text{eff}}. \end{aligned} \quad (\text{S5})$$

For  $\omega \ll \omega_{\text{p}}$ , we can approach that  $\frac{1}{\epsilon_{\text{m}}} - 1 \ll \frac{\omega_{\text{p}}^2}{\epsilon_{\text{m}}(\omega^2 + i\gamma\omega)}$ . This approach is reasonable because the general interest of the plasmonic effects is between the infrared and the near-ultraviolet regimes, which are far below the plasma frequency of most plasmonic metal

materials. Therefore, [eq S5](#) can be simplified as

$$\begin{aligned}\alpha_{\text{eff}} &= \frac{V}{-\frac{\epsilon_m(\omega^2 + i\gamma\omega)}{\omega_p^2} + L_{\text{eff}}} \\ &= V \frac{\frac{\omega_p^2}{\epsilon_m}}{\frac{\omega_p^2}{\epsilon_m} L_{\text{eff}} - \omega^2 - i\gamma\omega}.\end{aligned}\quad (\text{S6})$$

Furthermore, inserting  $L_{\text{eff}}$  in [eq S2](#) into [eq S6](#), one obtains

$$\alpha_{\text{eff}} = V \frac{\frac{\omega_p^2}{\epsilon_m}}{\frac{\omega_p^2}{\epsilon_m} (L - L_{\text{dyn}}\omega^2 - iL_{\text{rad}}\omega^3) - \omega^2 - i\gamma\omega}.\quad (\text{S7})$$

Subsequently, the equation can be simplified by regrouping the terms according to the real and imaginary components as

$$\alpha_{\text{eff}} = V \frac{\frac{\omega_p^2}{\epsilon_m}}{L \frac{\omega_p^2}{\epsilon_m} - \left(1 + L_{\text{dyn}} \frac{\omega_p^2}{\epsilon_m}\right) \omega^2 - i \left(\gamma + L_{\text{rad}} \frac{\omega_p^2}{\epsilon_m} \omega^2\right) \omega}.\quad (\text{S8})$$

To clearly see the resonant criterion from the equation, we can multiply both the numerator and denominator of [eq S8](#) by  $\frac{1}{1 + L_{\text{dyn}} \frac{\omega_p^2}{\epsilon_m}}$ , then we have

$$\begin{aligned}\alpha_{\text{eff}} &= V \frac{\frac{\frac{\omega_p^2}{\epsilon_m}}{1 + L_{\text{dyn}} \frac{\omega_p^2}{\epsilon_m}}}{\frac{L \frac{\omega_p^2}{\epsilon_m}}{1 + L_{\text{dyn}} \frac{\omega_p^2}{\epsilon_m}} - \omega^2 - i \left(\frac{\gamma + L_{\text{rad}} \frac{\omega_p^2}{\epsilon_m} \omega^2}{1 + L_{\text{dyn}} \frac{\omega_p^2}{\epsilon_m}}\right) \omega} \\ &= V \frac{\frac{\omega_p^2}{\epsilon_m + L_{\text{dyn}} \omega_p^2}}{\frac{L \omega_p^2}{\epsilon_m + L_{\text{dyn}} \omega_p^2} - \omega^2 - i \left(\frac{\epsilon_m \gamma + L_{\text{rad}} \omega_p^2 \omega^2}{\epsilon_m + L_{\text{dyn}} \omega_p^2}\right) \omega}.\end{aligned}\quad (\text{S9})$$

At this point, one can see that the pole of the real part of [eq S9](#) defines the resonant frequency of the LSPR response as

$$\omega_{\text{lsp}} \equiv \sqrt{\frac{L \omega_p^2}{\epsilon_m + L_{\text{dyn}} \omega_p^2}}.\quad (\text{S10})$$

Correspondingly, at the resonance (when  $\omega = \omega_{\text{lspr}}$ ), the imaginary term would determine the bandwidth of the spectrum, which can be approached as

$$\Gamma_{\text{lspr}} \equiv \frac{\epsilon_{\text{m}}\gamma + L_{\text{rad}}\omega_{\text{p}}^2\omega_{\text{lspr}}^2}{\epsilon_{\text{m}} + L_{\text{dyn}}\omega_{\text{p}}^2}. \quad (\text{S11})$$

Through these approximations, we can rewrite the expression in [eq S9](#) as

$$\alpha_{\text{eff}} = \frac{V}{L} \frac{\omega_{\text{lspr}}^2}{\omega_{\text{lspr}}^2 - \omega^2 - i\Gamma_{\text{lspr}}\omega}. \quad (\text{S12})$$

Hence, we have arrived at the similar expressions as shown in [eqs 14](#) and [15](#) in the main text.

The above results can subsequently be used to obtain qualitative descriptions of the magnitudes of the far- and near-field efficiencies through the following expressions ([eqs 10](#) and [11](#) in the main text)

$$Q_{\text{sca}} = \frac{k^4 |\alpha_{\text{eff}}|^2}{6\pi^2 \left(\frac{d}{2}\right)^2}, \quad (\text{S13})$$

$$\frac{|E_{\text{nf}}|^2}{|E_0|^2} = \left| 1 - \frac{L_{\text{eff}}\alpha_{\text{eff}}}{V} \right|^2. \quad (\text{S14})$$

First, we evaluate the expression for the far-field scattering by considering the complex amplitude of the polarizability in [eq S12](#) as

$$\begin{aligned} |\alpha_{\text{eff}}|^2 &= \alpha_{\text{eff}}\alpha_{\text{eff}}^* \\ &= \left(\frac{V}{L}\omega_{\text{lspr}}^2\right)^2 \left(\frac{1}{\omega_{\text{lspr}}^2 - \omega^2 - i\Gamma_{\text{lspr}}\omega}\right) \times \left(\frac{1}{\omega_{\text{lspr}}^2 - \omega^2 + i\Gamma_{\text{lspr}}\omega}\right) \\ &= \left(\frac{V}{L}\omega_{\text{lspr}}^2\right)^2 \frac{1}{(\omega_{\text{lspr}}^2 - \omega^2)^2 + (\Gamma_{\text{lspr}}\omega)^2}. \end{aligned} \quad (\text{S15})$$

Here,  $\alpha_{\text{eff}}^*$  denotes the complex conjugate of  $\alpha_{\text{eff}}$ . Furthermore, substituting [eq S15](#) into [eq S13](#)

and taking  $k = \frac{\omega}{c}$ , we get

$$Q_{\text{sca}}(\omega) = \frac{2}{3\pi^2 c^4} \frac{V^2 \omega_{\text{lspr}}^4}{L^2 d^2} \frac{\omega^4}{(\omega_{\text{lspr}}^2 - \omega^2)^2 + (\Gamma_{\text{lspr}} \omega)^2}. \quad (\text{S16})$$

This is [eq 19](#) from the main text. As explained in the paper, [eq S16](#) resembles a Lorentzian distribution function centered at  $\omega_{\text{lspr}}$  ([eq S10](#)) with a full width at half-maximum of  $\Gamma_{\text{lspr}}$  ([eq S11](#)). By taking  $\omega = \omega_{\text{lspr}}$ , [eq S16](#) becomes

$$Q_{\text{sca}}(\omega_{\text{lspr}}) = \frac{2}{3\pi^2 c^4} \frac{V^2}{L^2 d^2} \frac{\omega_{\text{lspr}}^6}{\Gamma_{\text{lspr}}^2}. \quad (\text{S17})$$

This equation gives the proportionality expression for the far-field efficiency at resonance as

$$Q_{\text{sca}}|_{\text{res}} \propto \left( \frac{V}{Ld} \frac{\omega_{\text{lspr}}^3}{\Gamma_{\text{lspr}}} \right)^2, \quad (\text{S18})$$

which results in the expression for [eq 21](#) of the main paper.

Second, to deduce the expression for the near-field enhancement, one can substitute [eq S12](#) into [eq S14](#). Since the magnitude of the near-field intensity is usually much larger than unity, as also shown in the main text, [eq S14](#) can be simplified as,

$$\frac{|E_{\text{nf}}|^2}{|E_0|^2} \approx \left| \frac{L_{\text{eff}} \alpha_{\text{eff}}}{V} \right|^2. \quad (\text{S19})$$

Hence, we can evaluate the complex-amplitude term as

$$\begin{aligned} |L_{\text{eff}} \alpha_{\text{eff}}|^2 &= (L_{\text{eff}} \alpha_{\text{eff}}) (L_{\text{eff}} \alpha_{\text{eff}})^* \\ &= L_{\text{eff}} L_{\text{eff}}^* \alpha_{\text{eff}} \alpha_{\text{eff}}^* \\ &= |L_{\text{eff}}|^2 |\alpha_{\text{eff}}|^2. \end{aligned} \quad (\text{S20})$$

Subsequently, inserting this expression into the near-field enhancement in [eq S19](#) and using

eq S15 for the  $|\alpha_{\text{eff}}|^2$ -term, we can obtain

$$\begin{aligned}\frac{|E_{\text{nf}}|^2}{|E_0|^2} &= \frac{1}{V^2} |L_{\text{eff}}|^2 |\alpha_{\text{eff}}|^2 \\ &= \frac{|L_{\text{eff}}|^2}{V^2} \left[ \frac{\left(\frac{V}{L} \omega_{\text{lspr}}^2\right)^2}{(\omega_{\text{lspr}}^2 - \omega^2)^2 + (\Gamma_{\text{lspr}} \omega)^2} \right].\end{aligned}\quad (\text{S21})$$

With a little arrangement, this equation gives the qualitative expression for the near-field efficiency shown in eq 20 in the main text as follows

$$\frac{|E_{\text{nf}}|^2}{|E_0|^2}(\omega) = \frac{|L_{\text{eff}}|^2 \omega_{\text{lspr}}^4}{L^2} \frac{1}{(\omega_{\text{lspr}}^2 - \omega^2)^2 + (\Gamma_{\text{lspr}} \omega)^2}.\quad (\text{S22})$$

As described in the main text, eq S22 is not a Lorentzian function. The maximum amplitude of the near field is reached at a frequency for which the derivative of the denominator of eq S22 is equal to zero. This approach gives

$$\begin{aligned}\frac{d}{d\omega} \left\{ (\omega_{\text{lspr}}^2 - \omega^2)^2 + (\Gamma_{\text{lspr}} \omega)^2 \right\} &= 0 \\ -4\omega (\omega_{\text{lspr}}^2 - \omega^2) + 2\Gamma_{\text{lspr}}^2 \omega &= 0 \\ \left( \omega^2 - \omega_{\text{lspr}}^2 + \frac{\Gamma_{\text{lspr}}^2}{2} \right) \omega &= 0 \\ \omega^2 - \omega_{\text{lspr}}^2 + \frac{\Gamma_{\text{lspr}}^2}{2} &= 0.\end{aligned}\quad (\text{S23})$$

By taking only the positive component of the square root, this relation gives the effective resonant frequency for the near-field spectra ( $\omega_{\text{nf}}$ ) as

$$\omega_{\text{nf}} = \omega_{\text{lspr}} \sqrt{1 - \frac{1}{2} \left( \frac{\Gamma_{\text{lspr}}}{\omega_{\text{lspr}}} \right)^2}.\quad (\text{S24})$$

This is eq 22 from the main text. For brevity, we are defining  $\Delta_{\text{lspr}} \equiv \sqrt{1 - \frac{1}{2} \left( \frac{\Gamma_{\text{lspr}}}{\omega_{\text{lspr}}} \right)^2}$ , as

shown in [Table 1](#). Therefore, we have

$$\omega_{\text{nf}} = \Delta_{\text{lspr}} \omega_{\text{lspr}}. \quad (\text{S25})$$

Subsequently, by substituting  $\omega_{\text{lspr}}$  in this expression back into [eq S22](#), the bandwidth of the near-field spectra can be obtained from

$$\begin{aligned} \frac{|E_{\text{nf}}|^2}{|E_0|^2}(\omega) &= \frac{|L_{\text{eff}}|^2}{L^2} \left( \frac{\omega_{\text{nf}}}{\Delta_{\text{lspr}}} \right)^4 \frac{1}{\left( \left( \frac{\omega_{\text{nf}}}{\Delta_{\text{lspr}}} \right)^2 - \omega^2 \right)^2 + (\Gamma_{\text{lspr}} \omega)^2} \\ &= \frac{|L_{\text{eff}}|^2}{L^2} \frac{\omega_{\text{nf}}^4}{(\omega_{\text{nf}}^2 - (\Delta_{\text{lspr}} \omega)^2)^2 + (\Delta_{\text{lspr}} \Gamma_{\text{lspr}} \Delta_{\text{lspr}} \omega)^2}. \end{aligned} \quad (\text{S26})$$

To simplify the equation, we approached that  $\omega' \cong \Delta_{\text{lspr}} \omega$ . This way, [eq S26](#) can be modified as

$$\begin{aligned} \frac{|E_{\text{nf}}|^2}{|E_0|^2}(\omega') &= \frac{|L_{\text{eff}}|^2}{L^2} \frac{\omega_{\text{nf}}^4}{(\omega_{\text{nf}}^2 - \omega'^2)^2 + (\Delta_{\text{lspr}} \Gamma_{\text{lspr}} \omega')^2} \\ &= \frac{|L_{\text{eff}}|^2}{L^2} \frac{\omega_{\text{nf}}^4}{(\omega_{\text{nf}}^2 - \omega'^2)^2 + (\Gamma_{\text{nf}} \omega')^2}. \end{aligned} \quad (\text{S27})$$

Hence, the bandwidth of the near-field spectra can be straightforwardly deduced from [eq S27](#) as

$$\begin{aligned} \Gamma_{\text{nf}} &\equiv \Gamma_{\text{lspr}} \Delta_{\text{lspr}} \\ &= \Gamma_{\text{lspr}} \sqrt{1 - \frac{1}{2} \left( \frac{\Gamma_{\text{lspr}}}{\omega_{\text{lspr}}} \right)^2}. \end{aligned} \quad (\text{S28})$$

This is [eq 23](#) from the main text. Finally, by taking  $\omega' = \omega_{\text{nf}}$  and returning both [eqs S24](#) and [S28](#) into [eq S27](#), we can obtain the intensity of the local field at resonance as

$$\left. \frac{|E_{\text{nf}}|^2}{|E_0|^2} \right|_{\text{res}} = \left( \frac{|L_{\text{eff}}|}{L} \frac{\omega_{\text{lspr}}}{\Gamma_{\text{lspr}}} \right)^2. \quad (\text{S29})$$

This is eq 24 from the main text.

## References

- (1) Biagioni, P.; Huang, J.-S.; Hecht, B. Nanoantennas for Visible and Infrared Radiation. *Reports on Progress in Physics* **2012**, *75*, 024402.
- (2) Rakić, A. D. Algorithm for the Determination of Intrinsic Optical Constants of Metal Films: Application to Aluminum. *Appl. Opt.* **1995**, *34*, 4755–4767.
